# Supplementary material for: In Vitro Anti-Inflammatory, Anti-Oxidant, and Cytotoxic Activities of Four Curcuma Species and the Isolation of Compounds from Curcuma aromatica Rhizome
Source: MDPI journal article supplement (doi:10.3390/biom10050799), 2020-05-21
Supplement: s1 [file s1]

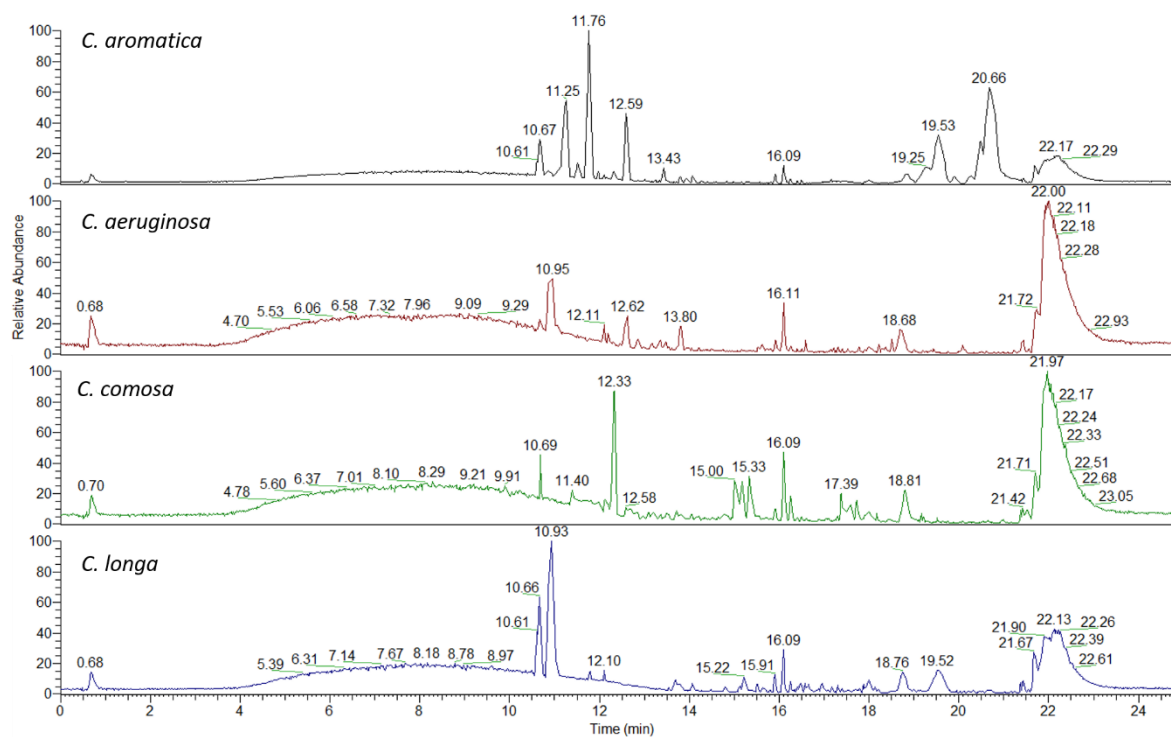

**Figure S1.** UPLC-HRMS chromatograms of four *Curcuma* extracts.
